# Supplementary material
Source: publisher site journal article supplement (https://www.dovepress.com/article/464671)
Supplement: Supplementary file 1 [file get_supplementary_file.php]

**Supplementary Table 1 Distribution of variant genotypes within the study population**

| **Rs number** | **Number,**  **n (%)** | **Minor allele frequency, %** | **Database of SNP minor allele frequency in the East Asian population, %** | **X2** | **P** |
| --- | --- | --- | --- | --- | --- |
| **rs10929285** |  |  | failed to be sequenced |  |  |
| **rs10929303** |  | 10 | 13 | 1.71 | >0.05 |
| CC | 113 (80.1) |  |  |  |  |
| CT | 28 (19.9) |  |  |  |  |
| TT | 0 |  |  |  |  |
| **rs1104892** |  | 30 | 35 | 0.36 | >0.05 |
| GG | 71 (50.4) |  |  |  |  |
| GA | 56 (39.7) |  |  |  |  |
| AA | 14 (9.9) |  |  |  |  |
| **rs12469671** |  | 40 | 25 | 0.51 | >0.05 |
| TT | 48 (34.0) |  |  |  |  |
| TC | 72 (51.1) |  |  |  |  |
| CC | 21 (14.9) |  |  |  |  |
| **rs12471030** |  | 17 | 22 | <0.01 | >0.05 |
| CC | 97 (68.8) |  |  |  |  |
| CT | 40 (28.4) |  |  |  |  |
| TT | 4 (2.8) |  |  |  |  |
| **rs12988520** |  | 22 | 30 | 2.17 | >0.05 |
| AA | 82 (58.2) |  |  |  |  |
| AC | 55 (39.0) |  |  |  |  |
| CC | 4 (2.8) |  |  |  |  |
| **rs16956647** |  | 23 | 25 | 2.37 | >0.05 |
| CC | 86 (61.0) |  |  |  |  |
| CT | 44 (31.2) |  |  |  |  |
| TT | 11 (7.8) |  |  |  |  |
| **rs17862880** |  | 13 | 23 | 1.11 | >0.05 |
| CC | 105 (74.5) |  |  |  |  |
| CA | 35 (24.8) |  |  |  |  |
| AA | 1 (0.7) |  |  |  |  |
| **rs2011425** |  | 17 | 21 | 3.13 | >0.05 |
| TT | 95 (67.4) |  |  |  |  |
| TG | 45 (31.9) |  |  |  |  |
| GG | 1 (0.7) |  |  |  |  |
| **rs202203863** |  | 0 | 13 | 0 | >0.05 |
| CC | 141 (100.0) |  |  |  |  |
| CG | 0 |  |  |  |  |
| GG | 0 |  |  |  |  |
| **rs2070959** |  | 23 | 20 | 10.46 | <0.05 |
| AA | 91 (64.5) |  |  |  |  |
| AG | 36 (25.5) |  |  |  |  |
| GG | 14 (9.9) |  |  |  |  |
| **rs2361501** |  | 28 | 29 | 0.26 | >0.05 |
| AA | 75 (53.2) |  |  |  |  |
| AT | 54 (38.3) |  |  |  |  |
| TT | 12 (8.5) |  |  |  |  |
| **rs2602381** |  | 21 | 27 | 2.34 | >0.05 |
| TT | 86 (61.0) |  |  |  |  |
| TC | 52 (36.9) |  |  |  |  |
| CC | 3 (2.1) |  |  |  |  |
| **rs28898568** |  | 17 | 13 | 5.45 | >0.05 |
| CC | 101 (71.6) |  |  |  |  |
| CT | 32 (22.7) |  |  |  |  |
| TT | 8 (5.7) |  |  |  |  |
| **rs28898622** |  | 13 | 17 | 0.96 | >0.05 |
| GG | 106 (75.2) |  |  |  |  |
| GA | 34 (24.1) |  |  |  |  |
| AA | 1 (0.7) |  |  |  |  |
| **rs3813007** |  | 45 | 38 | 0.53 | >0.05 |
| AA | 41 (29.1) |  |  |  |  |
| AT | 74 (52.5) |  |  |  |  |
| TT | 26 (18.4) |  |  |  |  |
| **rs3813008** |  | 14 | 19 | 1.62 | >0.05 |
| GG | 102 (72.3) |  |  |  |  |
| GA | 38 (27.0) |  |  |  |  |
| AA | 1 (0.7) |  |  |  |  |
| **rs4148328** |  | 37 | 43 | 1.04 | >0.05 |
| CC | 22 (15.6) |  |  |  |  |
| CT | 60 (42.6) |  |  |  |  |
| TT | 59 (41.8) |  |  |  |  |
| **rs4233633** |  | 21 | 28 | 0.10 | >0.05 |
| GG | 88 (62.4) |  |  |  |  |
| GC | 46 (32.6) |  |  |  |  |
| CC | 7 (5.0) |  |  |  |  |
| **rs45531144** |  | 12 | 9 | 4.80 | >0.05 |
| CC | 111 (78.7) |  |  |  |  |
| CT | 25 (17.7) |  |  |  |  |
| TT | 5 (3.5) |  |  |  |  |
| **rs5398** |  | 19 | 24 | 0.29 | >0.05 |
| GG | 92 (65.2) |  |  |  |  |
| GA | 45 (31.9) |  |  |  |  |
| AA | 4 (2.8) |  |  |  |  |
| **rs5418** |  | 40 | 38 | 0.23 | >0.05 |
| GG | 52 (36.9) |  |  |  |  |
| GA | 65 (46.1) |  |  |  |  |
| AA | 24 (17.0) |  |  |  |  |
| **rs5435** |  | 38 | 38 | 1.22 | >0.05 |
| TT | 23 (16.3) |  |  |  |  |
| TC | 60 (42.6) |  |  |  |  |
| CC | 58 (41.1) |  |  |  |  |
| **rs6717546** |  | 25 | 37 | 4.48 | >0.05 |
| AA | 4 (2.8) |  |  |  |  |
| AG | 62 (44.0) |  |  |  |  |
| GG | 75 (53.2) |  |  |  |  |
| **rs7349250** |  | 19 | 17 | 4.92 | >0.05 |
| AA | 97 (68.8) |  |  |  |  |
| AG | 35 (24.8) |  |  |  |  |
| GG | 9 (6.4) |  |  |  |  |
| **rs7595138** |  | 40 | 44 | 0.02 | >0.05 |
| TT | 51 (36.2) |  |  |  |  |
| TC | 67 (47.5) |  |  |  |  |
| CC | 23 (16.3) |  |  |  |  |
| **rs77410236** |  | 11 | 6 | 0.02 | >0.05 |
| CC | 111 (78.7) |  |  |  |  |
| CT | 28 (19.9) |  |  |  |  |
| TT | 2 (1.4) |  |  |  |  |
| **rs9924771** |  |  | failed to be sequenced |  |  |
| **rs9934336** |  | 15 | 12 | 4.08 | >0.05 |
| GG | 100 (70.9) |  |  |  |  |
| GA | 41 (29.1) |  |  |  |  |
| AA | 0 |  |  |  |  |

SNP: single nucleotide polymorphism. A *p* value < 0.05 was considered statistically significant.

**Supplementary Table 2** **Fasting blood glucose with genotypes** **before and after dapagliflozin treatment**

|  | **Model** |  | **Before treatment (mmol/L)** | **After treatment (mmol/L)** | **P******* | **P†** | **P§** |
| --- | --- | --- | --- | --- | --- | --- | --- |
| **rs10929303 (C>T)** |  | CC (N = 113) | 8.00 (5.55–10.91) | 6.40 (5.45–9.30) |  |  |  |
|  | CT (N = 28) | 8.00 (4.70–10.38) | 6.50 (5.43–9.05) |  |  |  |
|  | TT (N = 0) | Not Applicable (None) | |  |  |  |
|  | Pλ value | 0.792 |  |  |  |  |
| Dominant | CC vs. CT + TT |  |  | 0.729 | 0.804 | 0.747 |
| Recessive | CC + CT vs. TT |  |  | / | / | / |
| Additive | CT (vs. CC) |  |  | 0.729 | 0.804 | 0.747 |
|  | TT (vs. CC) |  |  | / | / | / |
| **rs12469671 (T>C)** |  | TT (N = 48) | 7.90 (5.43–10.43) | 6.10 (5.20–9.08) |  |  |  |
|  | TC (N = 72) | 7.83 (5.23–10.48) | 6.65 (5.70–8.78) |  |  |  |
|  | CC (N = 21) | 9.80 (5.80–12.85) | 6.20 (5.30–9.45) |  |  |  |
|  | Pλ value | 0.242 |  |  |  |  |
| Dominant | TT vs. TC + CC |  |  | 0.736 | 0.740 | 0.633 |
| Recessive | TT + TC vs. CC |  |  | 0.638 | 0.709 | 0.304 |
| Additive | TC (vs. TT) |  |  | 0.619 | 0.642 | 0.401 |
|  | CC (vs. TT) |  |  | 0.831 | 0.891 | 0.560 |
| **rs16956647 (C>T)** |  | CC (N = 86) | 8.00 (5.43–11.03) | 6.60 (5.58–9.15) |  |  |  |
|  | CT (N = 44) | 6.90 (5.08–9.00) | 6.35 (5.48–8.70) |  |  |  |
|  | TT (N = 11) | 11.00 (8.00–14.50) | 5.50 (4.90–11.20) |  |  |  |
|  | Pλ value | 0.027 |  |  |  |  |
| Dominant | CC vs. CT + TT |  |  | 0.416 | 0.477 | 0.212 |
| Recessive | CC + CT vs. TT |  |  | 0.270 | 0.313 | 0.071 |
| Additive | CT (vs. CC) |  |  | 0.670 | 0.712 | 0.499 |
|  | TT (vs. CC) |  |  | 0.248 | 0.291 | 0.058 |
| **rs17862880 (C>A)** |  | CC (N = 105) | 8.00 (6.10–9.40) | 6.60 (5.70–9.40) |  |  |  |
|  | CA (N = 35) | 7.10 (4.80–10.00) | 6.10 (5.20–7.50) |  |  |  |
|  | AA (N = 1) | Not Applicable (Only one patient) | |  |  |  |
|  | Pλ value | 0.066 |  |  |  |  |
| Dominant | CC vs. CA + AA |  |  | 0.181 | 0.116 | 0.251 |
| Recessive | CC + CA vs. AA |  |  | 0.607 | 0.423 | 0.705 |
| Additive | CA (vs. CC) |  |  | 0.201 | 0.139 | 0.267 |
|  | AA (vs. CC) |  |  | / | / | / |
| **rs2011425 (T>G)** |  | TT (N = 95) | 8.00 (6.30–11.30) | 6.30 (5.40–9.30) |  |  |  |
|  | TG (N = 45) | 8.15 (6.90–9.80) | 7.70 (6.65–10.10) |  |  |  |
|  | GG (N = 1) | Not Applicable (Only one patient) | |  |  |  |
|  | Pλ value | 0.071 |  |  |  |  |
| Dominant | TT vs. TG + GG |  |  | 0.243 | 0.313 | 0.165 |
| Recessive | TT + TG vs. GG |  |  | 0.788 | 0.804 | 0.938 |
| Additive | TG (vs. TT) |  |  | 0.230 | 0.299 | 0.167 |
|  | GG (vs. TT) |  |  | / | / | / |
| **rs202203863 (C>G)** |  | CC (N = 141) | 8.00 (5.45–10.71) | 6.40 (5.45–9.20) | / | / | / |
|  | CG (N = 0) | Not Applicable (None) | |  |  |  |
|  | GG (N = 0) | Not Applicable (None) | |  |  |  |
|  | Pλ value | / |  |  |  |  |
| Dominant | CC vs. CG + GG |  |  |  |  |  |
| Recessive | CC + CG vs. GG |  |  | / | / | / |
| Additive | CG (vs. CC) |  |  | / | / | / |
|  | GG (vs. CC) |  |  | / | / | / |
| **rs2070959 (A>G)** |  | AA (N = 91) | 7.80 (5.20–10.20) | 6.40 (5.40–9.10) |  |  |  |
|  | AG (N = 36) | 8.00 (6.18–11.45) | 6.70 (5.70–9.28) |  |  |  |
|  | GG (N = 14) | 10.75 (6.73–13.00) | 6.20 (5.40–9.93) |  |  |  |
|  | Pλ value | 0.092 |  |  |  |  |
| Dominant | AA vs. AG + GG |  |  | 0.535 | 0.570 | 0.318 |
| Recessive | AA + AG vs. GG |  |  | 0.815 | 0.853 | 0.349 |
| Additive | AG (vs. AA) |  |  | 0.566 | 0.593 | 0.514 |
|  | GG (vs. AA) |  |  | 0.654 | 0.723 | 0.286 |
| **rs2361501 (A>T)** |  | AA (N = 75) | 8.00 (5.50–10.82) | 6.60 (5.20–8.90) |  |  |  |
|  | AT (N = 54) | 7.88 (5.90–10.53) | 6.65 (5.78–9.75) |  |  |  |
|  | TT (N = 12) | 4.95 (4.20–11.08) | 6.00 (5.45–7.10) |  |  |  |
|  | Pλ value | 0.449 |  |  |  |  |
| Dominant | AA vs. AT + TT |  |  | 0.526 | 0.472 | 0.586 |
| Recessive | AA + AT vs. TT |  |  | 0.397 | 0.348 | 0.554 |
| Additive | AT (vs. AA) |  |  | 0.339 | 0.276 | 0.428 |
|  | TT (vs. AA) |  |  | 0.556 | 0.521 | 0.696 |
| **rs28898568 (C>T)** |  | CC (N = 101) | 8.00 (5.20–10.91) | 6.60 (5.70–9.00) |  |  |  |
|  | CT (N = 32) | 8.00 (5.55–10.18) | 6.20 (5.20–10.10) |  |  |  |
|  | TT (N = 8) | 8.75 (6.03–11.23) | 6.10 (5.35–8.30) |  |  |  |
|  | Pλ value | 0.899 |  |  |  |  |
| Dominant | CC vs. CT + TT |  |  | 0.686 | 0.660 | 0.346 |
| Recessive | CC + CT vs. TT |  |  | 0.543 | 0.516 | 0.211 |
| Additive | CT (vs. CC) |  |  | 0.856 | 0.840 | 0.611 |
|  | TT (vs. CC) |  |  | 0.532 | 0.503 | 0.191 |
| **rs28898622 (G>A)** |  | GG (N = 106) | 8.00 (5.65–10.66) | 6.40 (5.48–8.50) |  |  |  |
|  | GA (N = 34) | 8.00 (5.15–11.00) | 6.95 (5.30–10.33) |  |  |  |
|  | AA (N = 1) | Not Applicable (Only one patient) | |  |  |  |
|  | Pλ value | 0.557 |  |  |  |  |
| Dominant | GG vs. GA + AA |  |  | 0.454 | 0.480 | 0.553 |
| Recessive | GG + GA vs. AA |  |  | / | / | / |
| Additive | GA (vs. GG) |  |  | 0.428 | 0.453 | 0.557 |
|  | AA (vs. GG) |  |  | / | / | / |
| **rs3813007 (A>T)** |  | AA (N = 41) | 7.80 (5.35–10.66) | 6.40 (5.65–7.95) |  |  |  |
|  | AT (N = 74) | 7.10 (5.08–10.05) | 6.50 (5.28–9.03) |  |  |  |
|  | TT (N = 26) | 10.05 (8.00–12.55) | 7.60 (5.43–11.75) |  |  |  |
|  | Pλ value | 0.011 |  |  |  |  |
| Dominant | AA vs. AT + TT |  |  | 0.670 | 0.648 | 0.906 |
| Recessive | AA + AT vs. TT |  |  | 0.273 | 0.217 | 0.366 |
| Additive | AT (vs. AA) |  |  | 0.930 | 0.938 | 0.870 |
|  | TT (vs. AA) |  |  | 0.318 | 0.266 | 0.480 |
| **rs3813008 (G>A)** |  | GG (N = 102) | 8.00 (5.68–10.87) | 6.40 (5.40–9.40) | 0.523 | 0.660 | 0.552 |
|  | GA (N = 38) | 7.05 (4.70–10.40) | 6.65 (5.55–8.58) |  |  |  |
|  | AA (N = 1) | Not Applicable (Only one patient) | |  |  |  |
|  | Pλ value | 0.289 |  |  |  |  |
| Dominant | GG vs. GA + AA |  |  |  |  |  |
| Recessive | GG + GA vs. AA |  |  | / | / | / |
| Additive | GA (vs. GG) |  |  | 0.493 | 0.632 | 0.499 |
|  | AA (vs. GG) |  |  | / | / | / |
| **rs4148328 (C>T)** |  | CC (N = 22) | 7.83 (5.18–10.50) | 6.60 (5.68–8.53) |  |  |  |
|  | CT (N = 60) | 7.45 (5.28–10.35) | 6.50 (5.55–8.35) |  |  |  |
|  | TT (N = 59) | 8.00 (6.10–11.00) | 6.30 (5.20–9.40) |  |  |  |
|  | Pλ value | 0.468 |  |  |  |  |
| Dominant | CC vs. CT + TT |  |  | 0.975 | 0.993 | 0.587 |
| Recessive | CC + CT vs. TT |  |  | 0.975 | 0.993 | 0.808 |
| Additive | CT (vs. CC) |  |  | 0.920 | 0.826 | 0.626 |
|  | TT (vs. CC) |  |  | 0.909 | 0.866 | 0.624 |
| **rs4233633 (G>C)** |  | GG (N = 88) | 8.30 (6.18–10.96) | 6.40 (5.23–9.38) |  |  |  |
|  | GC (N = 46) | 7.15 (5.15–9.18) | 6.70 (5.98–9.15) |  |  |  |
|  | CC (N = 7) | 5.00 (4.50–11.00) | 5.80 (5.40–7.10) |  |  |  |
|  | Pλ value | 0.207 |  |  |  |  |
| Dominant | GG vs. GC + CC |  |  | 0.344 | 0.441 | 0.240 |
| Recessive | GG + GC vs. CC |  |  | 0.340 | 0.412 | 0.678 |
| Additive | GC (vs. GG) |  |  | 0.201 | 0.279 | 0.171 |
|  | CC (vs. GG) |  |  | 0.463 | 0.516 | 0.840 |
| **rs45531144 (C>T)** |  | CC (N = 111) | 8.00 (5.60–10.60) | 6.60 (5.50–9.30) |  |  |  |
|  | CT (N = 25) | 8.00 (4.85–11.76) | 6.40 (5.45–9.00) |  |  |  |
|  | TT (N = 5) | 4.50 (4.30–11.55) | 5.60 (5.25–10.00) |  |  |  |
|  | Pλ value | 0.550 |  |  |  |  |
| Dominant | CC vs. CT + TT |  |  | 0.662 | 0.594 | 0.684 |
| Recessive | CC + CT vs. TT |  |  | 0.984 | 0.917 | 0.749 |
| Additive | CT (vs. CC) |  |  | 0.953 | 0.960 | 0.783 |
|  | TT (vs. CC) |  |  |  |  |  |
| **rs5418 (G>A)** |  | GG (N = 52) | 8.00 (5.40–11.00) | 6.35 (5.10–8.98) |  |  |  |
|  | GA (N = 65) | 7.70 (5.50–10.55) | 6.60 (5.60–8.85) |  |  |  |
|  | AA (N = 24) | 8.05 (4.70–10.59) | 6.50 (5.53–9.60) |  |  |  |
|  | Pλ value | 0.914 |  |  |  |  |
| Dominant | GG vs. GA + AA |  |  | 0.190 | 0.234 | 0.421 |
| Recessive | GG + GA vs. AA |  |  | 0.383 | 0.544 | 0.237 |
| Additive | GA (vs. GG) |  |  | 0.284 | 0.291 | 0.648 |
|  | AA (vs. GG) |  |  | 0.215 | 0.311 | 0.208 |
| **rs5435 (T>C)** |  | TT (N = 23) | 8.00 (4.70–11.40) | 6.40 (5.60–7.40) |  |  |  |
|  | TC (N = 60) | 6.80 (5.05–10.00) | 6.70 (5.35–9.28) |  |  |  |
|  | CC (N = 58) | 8.65 (6.33–11.49) | 6.25 (5.40–9.73) |  |  |  |
|  | Pλ value | 0.102 |  |  |  |  |
| Dominant | TT vs. TC + CC |  |  | 0.378 | 0.357 | 0.998 |
| Recessive | TT + TC vs. CC |  |  | 0.821 | 0.719 | 0.345 |
| Additive | TC (vs. TT) |  |  | 0.298 | 0.253 | 0.711 |
|  | CC (vs. TT) |  |  | 0.559 | 0.595 | 0.685 |
| **rs6717546 (A>G)** |  | AA (N = 4) | 4.75 (3.68–16.40) | 5.70 (4.85–9.48) |  |  |  |
|  | AG (N = 62) | 7.95 (5.15–10.03) | 6.60 (5.38–8.25) |  |  |  |
|  | GG (N = 75) | 8.00 (6.10–11.50) | 6.40 (5.50–9.50) |  |  |  |
|  | Pλ value | 0.207 |  |  |  |  |
| Dominant | AA vs. AG + GG |  |  | 0.603 | 0.472 | 0.795 |
| Recessive | AA + AG vs. GG |  |  | 0.432 | 0.415 | 0.620 |
| Additive | AG (vs. AA) |  |  | 0.701 | 0.561 | 0.856 |
|  | GG (vs. AA) |  |  | 0.534 | 0.412 | 0.738 |
| **rs7349250 (A>G)** |  | AA (N = 97) | 7.80 (5.20–10.35) | 6.60 (5.45–8.75) |  |  |  |
|  | AG (N = 35) | 8.00 (6.10–11.30) | 6.40 (5.70–9.40) |  |  |  |
|  | GG (N = 9) | 10.50 (7.25–13.75) | 6.20 (4.65–9.15) |  |  |  |
|  | Pλ value | 0.180 |  |  |  |  |
| Dominant | AA vs. AG + GG |  |  | 0.446 | 0.455 | 0.383 |
| Recessive | AA + AG vs. GG |  |  | 0.215 | 0.236 | 0.096 |
| Additive | AG (vs. AA) |  |  | 0.750 | 0.738 | 0.807 |
|  | GG (vs. AA) |  |  | 0.204 | 0.222 | 0.094 |
| **rs7595138 (T>C)** |  | TT (N = 51) | 7.50 (5.10–10.20) | 6.40 (5.20–9.10) |  |  |  |
|  | TC (N = 67) | 8.00 (5.60–11.00) | 6.60 (5.70–8.40) |  |  |  |
|  | CC (N = 23) | 9.00 (5.90–12.70) | 6.20 (5.10–9.50) |  |  |  |
|  | Pλ value | 0.175 |  |  |  |  |
| Dominant | TT vs. TC + CC |  |  | 0.978 | 0.946 | 0.801 |
| Recessive | TT + TC vs. CC |  |  | 0.686 | 0.849 | 0.541 |
| Additive | TC (vs. TT) |  |  | 0.868 | 0.895 | 0.949 |
|  | CC (vs. TT) |  |  | 0.769 | 0.911 | 0.565 |
| **rs77410236 (C>T)** |  | CC (N = 111) | 8.00 (5.70–10.60) | 6.40 (5.50–8.90) |  |  |  |
|  | CT (N = 28) | 8.00 (5.03–11.78) | 7.25 (5.50–9.30) |  |  |  |
|  | TT ( N = 2) | Not Applicable (Only two patients) | |  |  |  |
|  | Pλ value | 0.420 |  |  |  |  |
| Dominant | CC vs. CT + TT |  |  | 0.864 | 0.901 | 0.551 |
| Recessive | CC + CT vs. TT |  |  | / | / | / |
| Additive | CT (vs. CC) |  |  | 0.733 | 0.990 | 0.537 |
|  | TT (vs. CC) |  |  | / | / | / |
| **rs9934336 (G>A)** |  | GG (N = 100) | 8.00 (6.10–11.08) | 6.65 (5.55–9.40) |  |  |  |
|  | GA (N = 41) | 7.20 (5.05–9.35) | 6.20 (5.40–8.00) |  |  |  |
|  | AA (N = 0) | Not Applicable (None) | |  |  |  |
|  | Pλ value | 0.104 |  |  |  |  |
| Dominant | GG vs. GA + AA |  |  | 0.903 | 0.809 | 0.979 |
| Recessive | GG + GA vs. AA |  |  | / | / | / |
| Additive | GA ( vs. GG) |  |  | 0.903 | 0.809 | 0.979 |
|  | AA (vs. GG) |  |  | / | / | / |

*****Analysis of covariance with the baseline fasting blood glucose as a covariate.

**†**Adjustment with baseline fasting glucose, age, gender and body mass index in the regression analysis.

**§**Adjustment with baseline fasting glucose, age, gender, body mass index, use of insulin and use of metformin in the regression analysis.

λBaseline fasting blood glucose levels among the different genotypes in one–way analysis of variance.

Data are presented as the median and interquartile range. A *p* value < 0.002 (0.05/25) was considered statistically significant.

**Supplementary Table 3 Glycated hemoglobin with genotypes before and after dapagliflozin treatment**

|  | **Model** |  | **Before treatment (%)** | **After treatment (%)** | **P*** | **P†** | **P§** |
| --- | --- | --- | --- | --- | --- | --- | --- |
| **rs10929303 (C>T)** |  | CC (N = 113) | 8.00 (6.78–10.50) | 8.10 (6.75–10.05) |  |  |  |
|  | CT (N = 28) | 8.90 (7.10–9.98) | 7.80 (7.03–10.10) |  |  |  |
|  | TT (N = 0) | Not Applicable (None) | |  |  |  |
|  | Pλ value | 0.499 |  |  |  |  |
| Dominant | CC vs. CT + TT |  |  | 0.897 | 0.958 | 0.773 |
| Recessive | CC + CT vs. TT |  |  | / | / | / |
| Additive | CT (vs. CC) |  |  | 0.897 | 0.958 | 0.773 |
|  | TT (vs. CC) |  |  | / | / | / |
| **rs1104892 (G>A)** |  | GG (N = 71) | 7.90 (6.80–10.00) | 8.30 (7.00–9.90) |  |  |  |
|  | GA (N = 56) | 8.60 (7.15–10.50) | 8.10 (6.73–10.18) |  |  |  |
|  | AA (N = 14) | 8.20 (6.60–9.20) | 7.65 (7.18–10.40) |  |  |  |
|  | Pλ value | 0.328 |  |  |  |  |
| Dominant | GG vs. GA + AA |  |  | 0.611 | 0.654 | 0.497 |
| Recessive | GG + GA vs. AA |  |  | 0.477 | 0.659 | 0.644 |
| Additive | GA (vs. GG) |  |  | 0.784 | 0.759 | 0.585 |
|  | AA (vs. GG) |  |  | 0.451 | 0.615 | 0.560 |
| **rs12469671 (T>C)** |  | TT (N = 48) | 7.80 (6.70–10.00) | 8.10 (6.73–10.05) |  |  |  |
|  | TC (N = 72) | 8.10 (6.83–9.98) | 7.75 (6.85–10.28) |  |  |  |
|  | CC (N = 21) | 8.60 (7.70–10.50) | 8.60 (7.45–9.20) |  |  |  |
|  | Pλ value | 0.386 |  |  |  |  |
| Dominant | TT vs. TC + CC |  |  | 0.585 | 0.816 | 0.798 |
| Recessive | TT + TC vs. CC |  |  | 0.577 | 0.730 | 0.558 |
| Additive | TC (vs. TT) |  |  | 0.871 | 0.961 | 0.663 |
|  | CC (vs. TT) |  |  | 0.567 | 0.776 | 0.744 |
| **rs12471030 (C>T)** |  | CC (N = 97) | 8.10 (6.85–10.30) | 8.30 (6.95–10.20) |  |  |  |
|  | CT (N = 40) | 8.10 (6.70–9.20) | 7.90 (6.80–9.45) |  |  |  |
|  | TT (N = 4) | 10.10 (8.98–11.15) | 8.70 (7.28–10.50) |  |  |  |
|  | Pλ value | 0.167 |  |  |  |  |
| Dominant | CC vs. CT + TT |  |  | 0.843 | 0.852 | 0.114 |
| Recessive | CC + CT vs. TT |  |  | 0.761 | 0.803 | 0.568 |
| Additive | CT (vs. CC) |  |  | 0.350 | 0.343 | 0.141 |
|  | TT (vs. CC) |  |  | 0.704 | 0.748 | 0.464 |
| **rs12988520 (A>C)** |  | AA (N = 82) | 8.15 (6.78–10.20) | 8.10 (6.70–10.10) |  |  |  |
|  | AC (N = 55) | 8.10 (7.15–10.05) | 8.20 (6.80–10.30) |  |  |  |
|  | CC (N = 4) | 8.45 (7.03–9.50) | 7.65 (7.10–8.58) |  |  |  |
|  | Pλ value | 0.960 |  |  |  |  |
| Dominant | AA vs. AC + CC |  |  | 0.752 | 0.683 | 0.428 |
| Recessive | AA + AC vs. CC |  |  | 0.437 | 0.558 | 0.578 |
| Additive | AC (vs. AA) |  |  | 0.763 | 0.773 | 0.498 |
|  | CC (vs. AA) |  |  | 0.418 | 0.535 | 0.541 |
| **rs16956647 (C>T)** |  | CC (N = 86) | 8.30 (6.93–10.40) | 8.10 (6.80–10.13) |  |  |  |
|  | CT (N = 44) | 8.00 (6.60–9.00) | 8.10 (7.03–10.05) |  |  |  |
|  | TT (N = 11) | 8.00 (7.10–10.10) | 8.60 (7.80–9.60) |  |  |  |
|  | Pλ value | 0.304 |  |  |  |  |
| Dominant | CC vs. CT + TT |  |  | 0.528 | 0.458 | 0.484 |
| Recessive | CC + CT vs. TT |  |  | 0.529 | 0.511 | 0.951 |
| Additive | CT (vs. CC) |  |  | 0.369 | 0.296 | 0.450 |
|  | TT (vs. CC) |  |  | 0.442 | 0.400 | 0.924 |
| **rs17862880 (C>A)** |  | CC (N = 105) | 8.05 (6.78–10.50) | 8.40 (7.00–10.20) |  |  |  |
|  | CA (N = 35) | 8.10 (6.90–9.20) | 7.40 (6.70–9.90) |  |  |  |
|  | AA (N = 1) | Not Applicable (Only one patient) | |  |  |  |
|  | Pλ value | 0.786 |  |  |  |  |
| Dominant | CC vs. CA + AA |  |  | 0.989 | 0.995 | 0.728 |
| Recessive | CC + CA vs. AA |  |  | / | / | / |
| Additive | CA (vs. CC) |  |  | 0.989 | 0.995 | 0.870 |
|  | AA (vs. CC) |  |  | / | / | / |
| **rs2011425 (T>G)** |  | TT (N = 95) | 8.00 (6.80–10.60) | 8.50 (7.00–10.20) |  |  |  |
|  | TG (N = 45) | 6.80 (4.70–9.30) | 7.10 (5.65–9.20) |  |  |  |
|  | GG (N = 1) | Not Applicable (Only one patient) | |  |  |  |
|  | Pλ value | 0.736 |  |  |  |  |
| Dominant | TT vs. TG + GG |  |  | 0.987 | 0.996 | 0.562 |
| Recessive | TT + TG vs. GG |  |  | / | / | / |
| Additive | TG (vs. TT) |  |  | 0.502 | 0.513 | 0.603 |
|  | GG (vs. TT) |  |  | / | / | / |
| **rs202203863 (C>G)** |  | CC (N = 141) | 8.10 (6.88–10.00) | 8.10 (6.83–10.00) |  |  |  |
|  | CG (N = 0) | Not Applicable (None) | |  |  |  |
|  | GG (N = 0) | Not Applicable (None) | |  |  |  |
|  | Pλ value | / |  |  |  |  |
| Dominant | CC vs. CG + GG |  |  | / | / | / |
| Recessive | CC + CG vs. GG |  |  | / | / | / |
| Additive | CG (vs. CC) |  |  | / | / | / |
|  | GG (vs. CC) |  |  | / | / | / |
| **rs2070959 (A>G)** |  | AA (N = 91) | 8.10 (6.78–9.93) | 7.90 (6.80–10.10) |  |  |  |
|  | AG (N = 36) | 7.90 (6.80–10.80) | 8.30 (6.78–10.10) |  |  |  |
|  | GG (N = 14) | 9.10 (8.00–10.50) | 8.85 (8.38–9.75) |  |  |  |
|  | Pλ value | 0.444 |  |  |  |  |
| Dominant | AA vs. AG + GG |  |  | 0.792 | 0.995 | 0.790 |
| Recessive | AA + AG vs. GG |  |  | 0.873 | 0.752 | 0.896 |
| Additive | AG (vs. AA) |  |  | 0.964 | 0.810 | 0.711 |
|  | GG (vs. AA) |  |  | 0.932 | 0.748 | 0.954 |
| **rs2361501 (A>T)** |  | AA (N = 75) | 7.80 (6.80–10.30) | 8.10 (6.70–10.20) |  |  |  |
|  | AT (N = 54) | 8.50 (7.35–10.20) | 8.55 (7.08–9.83) |  |  |  |
|  | TT (N = 12) | 7.55 (6.33–8.53) | 7.40 (6.90–9.93) |  |  |  |
|  | Pλ value | 0.187 |  |  |  |  |
| Dominant | AA vs. AT + TT |  |  | 0.778 | 0.541 | 0.650 |
| Recessive | AA + AT vs. TT |  |  | 0.212 | 0.224 | 0.339 |
| Additive | AT (vs. AA) |  |  | 0.857 | 0.963 | 0.888 |
|  | TT (vs. AA) |  |  | 0.211 | 0.242 | 0.337 |
| **rs3813007 (A>T)** |  | AA (N = 41) | 8.00 (6.80–10.50) | 7.60 (6.45–10.20) |  |  |  |
|  | AT (N = 74) | 8.00 (6.80–10.00) | 8.10 (6.90–9.83) |  |  |  |
|  | TT (N = 26) | 8.50 (7.85–10.05) | 8.85 (7.55–10.33) |  |  |  |
|  | Pλ value | 0.453 |  |  |  |  |
| Dominant | AA vs. AT + TT |  |  | 0.667 | 0.554 | 0.300 |
| Recessive | AA + AT vs. TT |  |  | 0.361 | 0.278 | 0.645 |
| Additive | AT (vs. AA) |  |  | 0.379 | 0.288 | 0.344 |
|  | TT (vs. AA) |  |  | 0.225 | 0.146 | 0.391 |
| **rs3813008 (G>A)** |  | GG (N = 102) | 8.10 (6.83–9.95) | 8.15 (6.88–9.95) |  |  |  |
|  | GA (N = 38) | 7.85 (6.83–10.08) | 7.75 (6.65–10.23) |  |  |  |
|  | AA (N = 1) | Not Applicable (Only one patient) | |  |  |  |
|  | Pλ value | 0.520 |  |  |  |  |
| Dominant | GG vs. GA + AA |  |  | 0.584 | 0.657 | 0.762 |
| Recessive | GG + GA vs. AA |  |  | / | / | / |
| Additive | GA (vs. GG) |  |  | 0.614 | 0.667 | 0.821 |
|  | AA (vs. GG) |  |  | / | / | / |
| **rs4148328 (C>T)** |  | CC (N = 22) | 8.30 (6.90–10.00) | 8.10 (6.88–10.10) |  |  |  |
|  | CT (N = 60) | 8.10 (6.90–10.08) | 8.10 (6.90–9.48) |  |  |  |
|  | TT (N = 59) | 8.00 (6.80–10.40) | 8.40 (7.00–10.20) |  |  |  |
|  | Pλ value | 0.681 |  |  |  |  |
| Dominant | CC vs. CT + TT |  |  | 0.777 | 0.533 | 0.675 |
| Recessive | CC + CT vs. TT |  |  | 0.489 | 0.671 | 0.646 |
| Additive | CT (vs. CC) |  |  | 0.451 | 0.384 | 0.790 |
|  | TT (vs. CC) |  |  | 0.258 | 0.294 | 0.509 |
| **rs4233633 (G>C)** |  | GG (N = 88) | 8.00 (6.83–10.50) | 8.45 (6.90–10.18) |  |  |  |
|  | GC (N = 46) | 8.30 (6.80–9.85) | 7.85 (6.68–9.95) |  |  |  |
|  | CC (N = 7) | 8.20 (6.55–8.45) | 7.40 (7.00–10.30) |  |  |  |
|  | Pλ value | 0.635 |  |  |  |  |
| Dominant | GG vs. GC + CC |  |  | 0.900 | 0.818 | 0.344 |
| Recessive | GG + GC vs. CC |  |  | 0.330 | 0.462 | 0.737 |
| Additive | GC (vs. GG) |  |  | 0.487 | 0.405 | 0.377 |
|  | CC (vs. GG) |  |  | 0.282 | 0.394 | 0.645 |
| **rs45531144 (C>T)** |  | CC (N = 111) | 8.00 (6.80–10.00) | 8.10 (6.90–9.90) |  |  |  |
|  | CT (N = 25) | 8.80 (7.00–10.65) | 7.80 (6.65–10.80) |  |  |  |
|  | TT (N = 5) | 8.00 (6.55–9.40) | 7.40 (6.80–9.30) |  |  |  |
|  | Pλ value | 0.560 |  |  |  |  |
| Dominant | CC vs. CT + TT |  |  | 0.320 | 0.426 | 0.985 |
| Recessive | CC + CT vs. TT |  |  | 0.593 | 0.768 | 0.843 |
| Additive | CT (vs. CC) |  |  | 0.748 | 0.832 | 0.907 |
|  | TT (vs. CC) |  |  | 0.576 | 0.753 | 0.853 |
| **rs5418 (G>A)** |  | GG (N = 52) | 7.70 (6.80–9.80) | 8.50 (6.75–10.20) |  |  |  |
|  | GA (N = 65) | 8.50 (6.78–10.50) | 7.80 (6.80–9.45) |  |  |  |
|  | AA (N = 24) | 8.30 (7.13–10.08) | 8.25 (7.23–10.58) |  |  |  |
|  | Pλ value | 0.658 |  |  |  |  |
| Dominant | GG vs. GA + AA |  |  | 0.604 | 0.823 | 0.591 |
| Recessive | GG + GA vs. AA |  |  | 0.932 | 0.909 | 0.684 |
| Additive | GA (vs. GG) |  |  | 0.893 | 0.805 | 0.466 |
|  | AA (vs. GG) |  |  | 0.991 | 0.827 | 0.979 |
| **rs6717546 (A>G)** |  | AA (N = 4) | 8.45 (7.40–8.60) | 7.20 (5.95–9.58) |  |  |  |
|  | AG (N = 62) | 8.20 (6.90–10.00) | 7.75 (6.80–9.65) |  |  |  |
|  | GG (N = 75) | 8.00 (6.75–10.50) | 8.60 (7.10–10.30) |  |  |  |
|  | Pλ value | 1.000 |  |  |  |  |
| Dominant | AA vs. AG + GG |  |  | 0.505 | 0.373 | 0.488 |
| Recessive | AA + AG vs. GG |  |  | 0.128 | 0.136 | 0.159 |
| Additive | AG (vs. AA) |  |  | 0.551 | 0.411 | 0.648 |
|  | GG (vs. AA) |  |  | 0.261 | 0.186 | 0.346 |
| **rs7349250 (A>G)** |  | AA (N = 97) | 8.10 (6.70–10.00) | 8.10 (6.80–10.15) |  |  |  |
|  | AG (N = 35) | 8.00 (7.10–10.90) | 7.70 (7.00–9.80) |  |  |  |
|  | GG (N = 9) | 8.10 (7.70–10.50) | 8.90 (7.85–9.90) |  |  |  |
|  | Pλ value | 0.694 |  |  |  |  |
| Dominant | AA vs. AG + GG |  |  | 0.592 | 0.749 | 0.826 |
| Recessive | AA + AG vs. GG |  |  | 0.905 | 0.956 | 0.824 |
| Additive | AG (vs. AA) |  |  | 0.968 | 0.897 | 0.722 |
|  | GG (vs. AA) |  |  | 0.899 | 0.945 | 0.864 |
| **rs7595138 (T>C)** |  | TT (N = 51) | 7.75 (6.65–9.93) | 8.10 (6.80–10.20) |  |  |  |
|  | TC (N = 67) | 8.15 (6.88–10.50) | 8.10 (6.80–10.30) |  |  |  |
|  | CC (N = 23) | 8.55 (7.78–10.40) | 8.50 (7.30–9.30) |  |  |  |
|  | Pλ value | 0.261 |  |  |  |  |
| Dominant | TT vs. TC + CC |  |  | 0.385 | 0.637 | 0.515 |
| Recessive | TT + TC vs. CC |  |  | 0.492 | 0.688 | 0.614 |
| Additive | TC (vs. TT) |  |  | 0.640 | 0.811 | 0.601 |
|  | CC (vs. TT) |  |  | 0.417 | 0.644 | 0.500 |
| **rs77410236 (C>T)** |  | CC (N = 111) | 8.10 (6.80–10.13) | 8.10 (6.80–9.60) |  |  |  |
|  | CT (N = 28) | 8.10 (6.93–10.08) | 9.60 (7.13–10.70) |  |  |  |
|  | TT ( N = 2) | Not Applicable (Only two patients) | |  |  |  |
|  | Pλ value | 0.515 |  |  |  |  |
| Dominant | CC vs. CT + TT |  |  | 0.507 | 0.617 | 0.313 |
| Recessive | CC + CT vs. TT |  |  | / | / | / |
| Additive | CT (vs. CC) |  |  | 0.463 | 0.517 | 0.268 |
|  | TT (vs. CC) |  |  | / | / | / |
| **rs9934336 (G>A)** |  | GG (N = 100) | 8.30 (6.85–10.50) | 8.45 (6.73–10.20) |  |  |  |
|  | GA (N = 41) | 7.70 (6.70–9.00) | 7.80 (6.95–9.80) |  |  |  |
|  | AA (N = 0) | Not Applicable (None) | |  |  |  |
|  | Pλ value | 0.082 |  |  |  |  |
| Dominant | GG vs. GA + AA |  |  | 0.323 | 0.154 | 0.233 |
| Recessive | GG + GA vs. AA |  |  | / | / | / |
| Additive | GA ( vs. GG) |  |  | 0.323 | 0.154 | 0.233 |
|  | AA (vs. GG) |  |  | / | / | / |

*****Analysis of covariance with the baseline glycated hemoglobin as a covariate.

**†**Adjustment with baseline glycated hemoglobin, age, gender and body mass index in the regression analysis.

**§**Adjustment with baseline glycated hemoglobin, age, gender, body mass index, use of insulin and use of metformin in the regression analysis.

λBaseline glycated hemoglobin levels among the different genotypes in one–way analysis of variance.

Data are presented as the median and interquartile range. A *p* value < 0.002 (0.05/25) was considered statistically significant.

**Supplementary Table 4 Gender with genotypes**

|  | **Model** |  | **Fasting blood glucose after dapagliflozin treatment** | | **Glycated hemoglobin after dapagliflozin treatment** | |
| --- | --- | --- | --- | --- | --- | --- |
|  |  |  | **P value for male** | **P value for female** | **P value for male** | **P value for female** |
| **rs10929303 (C>T)** | Dominant | CC vs. CT + TT | 0.991 | 0.495 | 0.903 | 0.703 |
| Recessive | CC + CT vs. TT | / | / | / | / |
| Additive | CT (vs. CC) | 0.991 | 0.495 | 0.903 | 0.703 |
|  | TT (vs. CC) | / | / | / | / |
| **rs1104892 (G>A)** | Dominant | GG vs. GA + AA | 0.474 | 0.093 | 0.826 | 0.644 |
| Recessive | GG + GA vs. AA | 0.732 | 0.500 | 0.678 | 0.588 |
| Additive | GA (vs. GG) | 0.395 | 0.061 | 0.931 | 0.632 |
|  | AA (vs. GG) | 0.844 | 0.496 | 0.761 | 0.573 |
| **rs12469671 (T>C)** | Dominant | TT vs. TC + CC | 0.660 | 0.714 | 0.882 | 0.840 |
| Recessive | TT + TC vs. CC | 0.236 | 0.307 | 0.390 | 0.200 |
| Additive | TC (vs. TT) | 0.318 | 0.774 | 0.674 | 0.639 |
|  | CC (vs. TT) | 0.446 | 0.813 | 0.430 | 0.501 |
| **rs12471030 (C>T)** | Dominant | CC vs. CT + TT | 0.041 | 0.317 | 0.315 | 0.917 |
| Recessive | CC + CT vs. TT | 0.678 | / | 0.691 | / |
| Additive | CT (vs. CC) | 0.023 | 0.317 | 0.367 | 0.917 |
|  | TT (vs. CC) | 0.896 | / | 0.478 | / |
| **rs12988520 (A>C)** | Dominant | AA vs. AC + CC | 0.081 | 0.115 | 0.682 | 0.876 |
| Recessive | AA + AC vs. CC | 0.583 | / | 0.591 | / |
| Additive | AC (vs. AA) | 0.059 | 0.115 | 0.784 | 0.876 |
|  | CC (vs. AA) | 0.661 | / | 0.525 | / |
| **rs16956647 (C>T)** | Dominant | CC vs. CT + TT | 0.523 | 0.719 | 0.486 | 0.117 |
| Recessive | CC + CT vs. TT | 0.371 | 0.457 | 0.902 | 0.098 |
| Additive | CT (vs. CC) | 0.755 | 0.939 | 0.486 | 0.244 |
|  | TT (vs. CC) | 0.586 | 0.595 | 0.613 | 0.017 |
| **rs17862880 (C>A)** | Dominant | CC vs. CA + AA | 0.058 | 0.937 | 0.553 | 0.847 |
| Recessive | CC + CA vs. AA | / | / | / | / |
| Additive | CA (vs. CC) | 0.058 | 0.944 | 0.553 | 0.818 |
|  | AA (vs. CC) | / | / | / | / |
| **rs2011425 (T>G)** | Dominant | TT vs. TG + GG | 0.315 | 0.975 | 0.516 | 0.904 |
| Recessive | TT + TG vs. GG | / | / | / | / |
| Additive | TG (vs. TT) | 0.294 | 0.975 | 0.590 | 0.904 |
|  | GG (vs. TT) | / | / | / | / |
| **rs202203863 (C>G)** | Dominant | CC vs. CG + GG | / | / | / | / |
| Recessive | CC + CG vs. GG | / | / | / | / |
| Additive | CG (vs. CC) | / | / | / | / |
|  | GG (vs. CC) | / | / | / | / |
| **rs2070959 (A>G)** | Dominant | AA vs. AG + GG | 0.5222 | 0.892 | 0.760 | 0.816 |
| Recessive | AA + AG vs. GG | 0.418 | 0.459 | 0.876 | 0.212 |
| Additive | AG (vs. AA) | 0.811 | 0.614 | 0.684 | 0.776 |
|  | GG (vs. AA) | 0.310 | 0.557 | 0.876 | 0.149 |
| **rs2361501 (A>T)** | Dominant | AA vs. AT + TT | 0.814 | 0.271 | 0.982 | 0.506 |
| Recessive | AA + AT vs. TT | 0.293 | 0.941 | 0.588 | 0.014 |
| Additive | AT (vs. AA) | 0.387 | 0.235 | 0.834 | 0.860 |
|  | TT (vs. AA) | 0.579 | 0.866 | 0.616 | 0.009 |
| **rs2602381 (T>C)** | Dominant | TT vs. TC + CC | 0.208 | 0.024 | 0.175 | 0.865 |
| Recessive | TT + TC vs. CC | 0.629 | / | 0.694 | / |
| Additive | TC (vs. TT) | 0.172 | 0.024 | 0.202 | 0.864 |
|  | CC (vs. TT) | 0.682 | / | 0.482 | / |
| **rs28898568 (C>T)** | Dominant | CC vs. CT + TT | 0.436 | 0.597 | 0.235 | 0.136 |
| Recessive | CC + CT vs. TT | 0.852 | 0.175 | 0.869 | 0.570 |
| Additive | CT (vs. CC) | 0.447 | 0.165 | 0.231 | 0.179 |
|  | TT (vs. CC) | 0.756 | 0.220 | 0.689 | 0.438 |
| **rs28898622 (G>A)** | Dominant | GG vs. GA + AA | 0.348 | 0.654 | 0.727 | 0.629 |
| Recessive | GG + GA vs. AA | / | / | / | / |
| Additive | GA (vs. GG) | 0.314 | 0.654 | 0.611 | 0.629 |
|  | AA (vs. GG) | / | / | / | / |
| **rs3813007 (A>T)** | Dominant | AA vs. AT + TT | 0.773 | 0.092 | 0.515 | 0.070 |
| Recessive | AA + AT vs. TT | 0.532 | 0.099 | 0.512 | 0.176 |
| Additive | AT (vs. AA) | 0.616 | 0.146 | 0.642 | 0.164 |
|  | TT (vs. AA) | 0.865 | 0.065 | 0.596 | 0.030 |
| **rs3813008 (G>A)** | Dominant | GG vs. GA + AA | 0.115 | 0.073 | 0.908 | 0.264 |
| Recessive | GG + GA vs. AA | / | / | / | / |
| Additive | GA (vs. GG) | 0.101 | 0.073 | 0.940 | 0.264 |
|  | AA (vs. GG) | / | / | / | / |
| **rs4148328 (C>T)** | Dominant | CC vs. CT + TT | 0.876 | 0.921 | 0.645 | 0.257 |
| Recessive | CC + CT vs. TT | 0.462 | 0.248 | 0.843 | 0.540 |
| Additive | CT (vs. CC) | 0.789 | 0.515 | 0.682 | 0.941 |
|  | TT (vs. CC) | 0.716 | 0.517 | 0.518 | 0.259 |
| **rs4233633 (G>C)** | Dominant | GG vs. GC + CC | 0.345 | 0.606 | 0.456 | 0.545 |
| Recessive | GG + GC vs. CC | 0.478 | 0.500 | 0.505 | 0.878 |
| Additive | GC (vs. GG) | 0.220 | 0.734 | 0.585 | 0.573 |
|  | CC (vs. GG) | 0.460 | 0.553 | 0.344 | 0.978 |
| **rs45531144 (C>T)** | Dominant | CC vs. CT + TT | 0.365 | 0.668 | 0.971 | 0.517 |
| Recessive | CC + CT vs. TT | 0.962 | 0.893 | 0.723 | 0.862 |
| Additive | CT (vs. CC) | 0.344 | 0.688 | 0.831 | 0.475 |
|  | TT (vs. CC) | 0.905 | 0.805 | 0.766 | 0.835 |
| **rs5398 (G>A)** | Dominant | GG vs. GA + AA | 0.173 | 0.223 | 0.404 | 0.078 |
| Recessive | GG + GA vs. AA | 0.851 | 0.058 | 0.125 | 0.096 |
| Additive | GA (vs. GG) | 0.142 | 0.388 | 0.208 | 0.154 |
|  | AA (vs. GG) | 0.954 | 0.025 | 0.096 | 0.129 |
| **rs5418 (G>A)** | Dominant | GG vs. GA + AA | 0.301 | 0.596 | 0.898 | 0.399 |
| Recessive | GG + GA vs. AA | 0.254 | 0.584 | 0.760 | 0.534 |
| Additive | GA (vs. GG) | 0.432 | 0.460 | 0.816 | 0.673 |
|  | AA (vs. GG) | 0.152 | 0.671 | 0.754 | 0.675 |
| **rs5435 (T>C)** | Dominant | TT vs. TC + CC | 0.278 | 0.844 | 0.429 | 0.093 |
| Recessive | TT + TC vs. CC | 0.672 | 0.860 | 0.367 | 0.659 |
| Additive | TC (vs. TT) | 0.209 | 0.781 | 0.659 | 0.290 |
|  | CC (vs. TT) | 0.543 | 0.919 | 0.182 | 0.247 |
| **rs6717546 (A>G)** | Dominant | AA vs. AG + GG | 0.677 | 0.326 | 0.426 | 0.551 |
| Recessive | AA + AG vs. GG | 0.245 | 0.665 | 0.225 | 0.466 |
| Additive | AG (vs. AA) | 0.630 | 0.439 | 0.689 | 0.655 |
|  | GG (vs. AA) | 0.660 | 0.406 | 0.245 | 0.443 |
| **rs7349250 (A>G)** | Dominant | AA vs. AG + GG | 0.403 | 0.887 | 0.985 | 0.781 |
| Recessive | AA + AG vs. GG | 0.190 | 0.574 | 0.915 | 0.532 |
| Additive | AG (vs. AA) | 0.202 | 0.951 | 0.947 | 0.987 |
|  | GG (vs. AA) | 0.151 | 0.806 | 0.807 | 0.445 |
| **rs7595138 (T>C)** | Dominant | TT vs. TC + CC | 0.742 | 0.492 | 0.827 | 0.743 |
| Recessive | TT + TC vs. CC | 0.419 | 0.284 | 0.366 | 0.142 |
| Additive | TC (vs. TT) | 0.385 | 0.300 | 0.997 | 0.445 |
|  | CC (vs. TT) | 0.531 | 0.886 | 0.359 | 0.264 |
| **rs77410236 (C>T)** | Dominant | CC vs. CT + TT | 0.996 | 0.647 | 0.726 | 0.723 |
| Recessive | CC + CT vs. TT | / | / | / | / |
| Additive | CT (vs. CC) | 0.840 | 0.647 | 0.542 | 0.723 |
|  | TT (vs. CC) | / | / | / | / |
| **rs9934336 (G>A)** | Dominant | GG vs. GA + AA | 0.893 | 0.353 | 0.270 | 0.363 |
| Recessive | GG + GA vs. AA | / | / | / | / |
| Additive | GA ( vs. GG) | 0.893 | 0.353 | 0.270 | 0.363 |
|  | AA (vs. GG) | / | / | / | / |

The missing part indicates that the number of cases is too small to be analyzed further.

*p* values were calculated in the regression analysis after adjustment with baseline fasting blood glucose/glycated hemoglobin levels, age, gender, body mass index, use of insulin and use of metformin in the regression analysis. A *p* value < 0.002 (0.05/25) was considered statistically significant.

**Supplementary Table 5 Change of fasting blood glucose levels with genotypes**

|  |  | **Change of fasting blood glucose levels (mmol/L)** | **P** |
| --- | --- | --- | --- |
| **rs10929303 (C>T)** | CC (N = 113) | 2.10 (–0.25–4.75) | 0.887 |
| CT (N = 28) | 2.10 (0.03–5.13) |  |
| TT (N = 0) | / |  |
| **rs1104892 (G>A)** | GG (N = 71) | 2.60 (0.30–5.20) | 0.281 |
| GA (N = 56) | 1.05 (–0.60–3.45) |  |
| AA (N = 14) | 2.00 (0.05–6.30) |  |
| **rs12469671 (T>C)** | TT (N = 48) | 2.15 (0.00–4,48) | 0.299 |
| TC (N = 72) | 1.30 (–0.38–5.13) |  |
| CC (N = 21) | 2.90 (0.50–5.60) |  |
| **rs12988520 (A>C)** | AA (N = 82) | 2.53 (0.18–4.83) | 0.276 |
| AC (N = 55) | 1.80 (–0.70–4.80) |  |
| CC (N = 4) | 1.70 (–0.03–5.53) |  |
| **rs17862880 (C>A)** | CC (N = 105) | 2.20 (0.00–4.60) | 0.607 |
| CA (N = 35) | 0.80 (–0.40–4.90) |  |
| AA (N = 1) | / |  |
| **rs202203863 (C>G)** | CC (N = 141) | 2.10 (–0.10–4.75) | / |
| CG (N = 0) | / |  |
| GG (N = 0) | / |  |
| **rs2070959 (A>G)** | AA (N = 91) | 1.60 (–0.30–4.10) | 0.200 |
| AG (N = 36) | 3.15 (0.35–5.58) |  |
| GG (N = 14) | 2.90 (0.90–6.40) |  |
| **rs2361501 (A>T)** | AA (N = 75) | 2.60 (0.00–5.20) | 0.556 |
| AT (N = 54) | 2.10 (–0.08–3.70) |  |
| TT (N = 12) | 0.00 (–0.78–5.95) |  |
| **rs28898568 (C>T)** | CC (N = 101) | 1.90 (–0.20–4.85) | 0.641 |
| CT (N = 32) | 2.45 (–0.23–5.53) |  |
| TT (N = 8) | 2.35 (0.73–4.53) |  |
| **rs28898622 (G>A)** | GG (N = 106) | 2.10 (0.00–4.83) | 0.608 |
| GA (N = 34) | 1.95 (–0.80–4.83) |  |
| AA (N = 1) | / |  |
| **rs3813007 (A>T)** | AA (N = 41) | 2.00 (–0.15–4.45) | 0.668 |
| AT (N = 74) | 1.75 (–0.03–4.63) |  |
| TT (N = 26) | 2.65 (–1.13–5.93) |  |
| **rs4148328 (C>T)** | CC (N = 22) | 1.85 (–0.13–5.25) | 0.689 |
| CT (N = 60) | 1.60 (–0.40–4.48) |  |
| TT (N = 59) | 2.25 (0.15–5.28) |  |
| **rs4233633 (G>C)** | GG (N = 88) | 2.60 (0.30–5.08) | 0.139 |
| GC (N = 46) | 0.62 (–0.70–3.90) |  |
| CC (N = 7) | 0.20 (0.10–4.90) |  |
| **rs45531144 (C>T)** | CC (N = 111) | 2.20 (–0.10–4.70) | 0.802 |
| CT (N = 25) | 2.00 (–0.50–6.21) |  |
| TT (N = 5) | 0.10 (–0.05–2.55) |  |
| **rs5398 (G>A)** | GG (N = 92) | 2.15 (0.03–4.68) | 0.401 |
| GA (N = 45) | 1.50 (–0.75–4.75) |  |
| AA (N = 4) | 2.55 (–2.50–6.55) |  |
| **rs5418 (G>A)** | GG (N = 52) | 2.25 (0.23–5.40) | 0.289 |
| GA (N = 65) | 2.00 (–0.35–4.90) |  |
| AA (N = 24) | 0.90 (–0.68–3.53) |  |
| **rs5435 (T>C)** | TT (N = 23) | 2.10 (–0.10–6.30) | 0.457 |
| TC (N = 60) | 1.90 (–0.10–4.48) |  |
| CC (N = 58) | 2.15 (–0.33–4.63) |  |
| **rs6717546 (A>G)** | AA (N = 4) | 0.05 (–0.18–7.93) | 0.893 |
| AG (N = 62) | 1.80 (–0.40–4.83) |  |
| GG (N = 75) | 2.20 (0.00–4.70) |  |
| **rs7349250 (A>G)** | AA (N = 97) | 1.80 (–0.20–4.60) | 0.126 |
| AG (N = 35) | 2.20 (–0.50–5.20) |  |
| GG (N = 9) | 4.30 (1.40–8.15) |  |
| **rs7595138 (T>C)** | TT (N = 51) | 1.60 (–0.40–3.60) | 0.357 |
| TC (N = 67) | 2.46 (–0.10–4.90) |  |
| CC (N = 23) | 2.30 (0.20–5.60) |  |
| **rs77410236 (C>T)** | CC (N = 111) | 2.20 (–0.10–4.80) | 0.510 |
| CT (N = 28) | 1.55 (–0.15–5.10) |  |
| TT ( N = 2) | / |  |
| **rs9934336 (G>A)** | GG (N = 100) | 2.35 (0.00–5.13) | 0.215 |
| GA (N = 41) | 1.60 (–0.50–3.45) |  |
| AA (N = 0) | / |  |

Data are presented as the median and interquartile range and compared by Kruskal–Wallis test. A *p* value < 0.002 (0.05/25) was considered statistically significant.

**Supplementary Table 6 Change of glycated hemoglobin levels with genotypes**

|  |  | **Change of glycated hemoglobin levels (%)** | **P** |
| --- | --- | --- | --- |
| **rs10929303 (C>T)** | CC (N = 113) | 0.00 (–1.33–0.60) | 0.439 |
| CT (N = 28) | 0.05 (–1.23–1.55) |  |
| TT (N = 0) | / |  |
| **rs1104892 (G>A)** | GG (N = 71) | 0.00 (–1.15–0.04) | 0.705 |
| GA (N = 56) | 0.10 (–1.20–0.90) |  |
| AA (N = 14) | –0.50 (–1.30–1.40) |  |
| **rs12469671 (T>C)** | TT (N = 48) | 0.00 (–1.30–0.30) | 0.340 |
| TC (N = 72) | 0.00 (–1.38–0.90) |  |
| CC (N = 21) | 0.20 (–0.90–1.60) |  |
| **rs12988520 (A>C)** | AA (N = 82) | 0.00 (–1.30–0.60) | 0.488 |
| AC (N = 55) | 0.00 (–1.25–0.80) |  |
| CC (N = 4) | 0.95 (–0.75–1.45) |  |
| **rs16956647 (C>T)** | CC (N = 86) | 0.10 (–0.70–0.83) | 0.333 |
| CT (N = 44) | –0.10 (–1.60–0.60) |  |
| TT (N = 11) | –0.90 (–2.00–3.00) |  |
| **rs17862880 (C>A)** | CC (N = 105) | 0.00 (–0.90–0.60) | 0.780 |
| CA (N = 35) | –0.20 (–2.30–1.60) |  |
| AA (N = 1) | / |  |
| **rs2011425 (T>G)** | TT (N = 95) | 0.10 (–0.90–0.60) | 0.452 |
| TG (N = 45) | –0.35 (–1.48–1.28) |  |
| GG (N = 1) | / |  |
| **rs202203863 (C>G)** | CC (N = 141) | 0.00 (–1.25–0.78) | / |
| CG (N = 0) | / |  |
| GG (N = 0) | / |  |
| **rs2070959 (A>G)** | AA (N = 91) | 0.00 (–1.35–0.65) | 0.405 |
| AG (N = 36) | –0.10 (1.25–0.75) |  |
| GG (N = 14) | 0.30 (–0.23–1.50) |  |
| **rs2361501 (A>T)** | AA (N = 75) | 0.00 (–1.43–0.43) | 0.669 |
| AT (N = 54) | 0.10 (–0.95–0.83) |  |
| TT (N = 12) | 0.20 (–1.13–1.30) |  |
| **rs2602381 (T>C)** | TT (N = 86) | 0.00 (–0.95–0.40) | 0.509 |
| TC (N = 52) | 0.00 (–1.40–1.60) |  |
| CC (N = 3) | 1.00 (–1.30–1.60) |  |
| **rs28898568 (C>T)** | CC (N = 101) | 0.05 (–0.98–0.90) | 0.415 |
| CT (N = 32) | –0.10 (–2.50–0.40) |  |
| TT (N = 8) | –0.15 (1.35–0.80) |  |
| **rs28898622 (G>A)** | GG (N = 106) | 0.00 (–1.00–0.60) | 0.494 |
| GA (N = 34) | –0.40 (–1.48–0.88) |  |
| AA (N = 1) | / |  |
| **rs3813007 (A>T)** | AA (N = 41) | 0.00 (–0.58–0.75) | 0.873 |
| AT (N = 74) | 0.00 (–1.40–0.60) |  |
| TT (N = 26) | 0.10 (–1.75–0.90) |  |
| **rs3813008 (G>A)** | GG (N = 102) | 0.10 (–1.30–0.70) | 0.822 |
| GA (N = 38) | –0.05 (–1.23–0.75) |  |
| AA (N = 1) | / |  |
| **rs4148328 (C>T)** | CC (N = 22) | 0.40 (–1.23–2.08) | 0.408 |
| CT (N = 60) | 0.10 (–0.85–0.58) |  |
| TT (N = 59) | 0.00 (–1.40–0.60) |  |
| **rs4233633 (G>C)** | GG (N = 88) | 0.05 (–0.90–0.60) | 0.746 |
| GC (N = 46) | –0.20 (–1.40–1.40) |  |
| CC (N = 7) | 0.90 (–1.25–1.50) |  |
| **rs45531144 (C>T)** | CC (N = 111) | 0.00 (–1.30–0.65) | 0.451 |
| CT (N = 25) | 0.10 (–1.35–2.08) |  |
| TT (N = 5) | 0.30 (–0.25–4.23) |  |
| **rs5418 (G>A)** | GG (N = 52) | 0.05 (–1.53–0.85) | 0.946 |
| GA (N = 65) | 0.00 (–1.33–0.60) |  |
| AA (N = 24) | 0.00 (–0.65–0.75) |  |
| **rs6717546 (A>G)** | AA (N = 4) | 1.25 (–2.18–2.65) | 0.497 |
| AG (N = 62) | 0.00 (–1.30–1.40) |  |
| GG (N = 75) | 0.00 (–1.00–0.50) |  |
| **rs7349250 (A>G)** | AA (N = 97) | 0.00 (–1.30–0.68) | 0.692 |
| AG (N = 35) | 0.00 (–1.10–0.80) |  |
| GG (N = 9) | 0.20 (–0.90–3.00) |  |
| **rs9934336 (G>A)** | GG (N = 100) | 0.10 (–1.05–0.78) | 0.492 |
| GA (N = 41) | –0.05 (–1.30–0.78) |  |
| AA (N = 0) | / |  |

Data are presented as the median and interquartile range and compared by Kruskal–Wallis test. A *p* value < 0.002 (0.05/25) was considered statistically significant.
